# Supplementary material
Source: publisher figshare collection journal article supplement (https://frontiersin.figshare.com/ndownloader/files/26920661)
Supplement: Supplementary file [file 26920661]

Supp. Fig. 1

**A** Mean Amplitude 2M

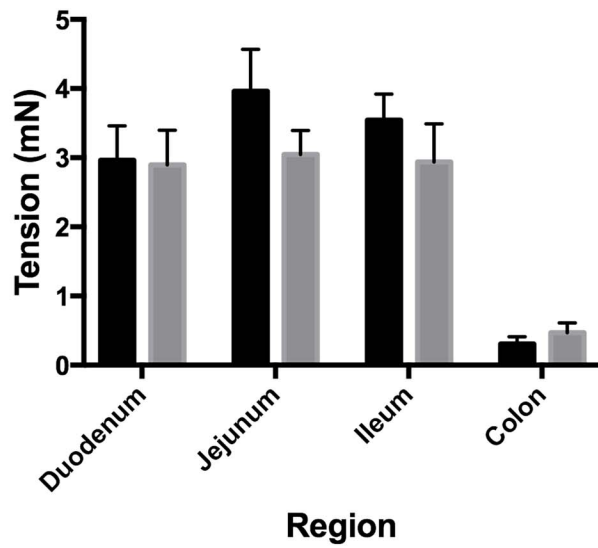

**B** Frequency 2M

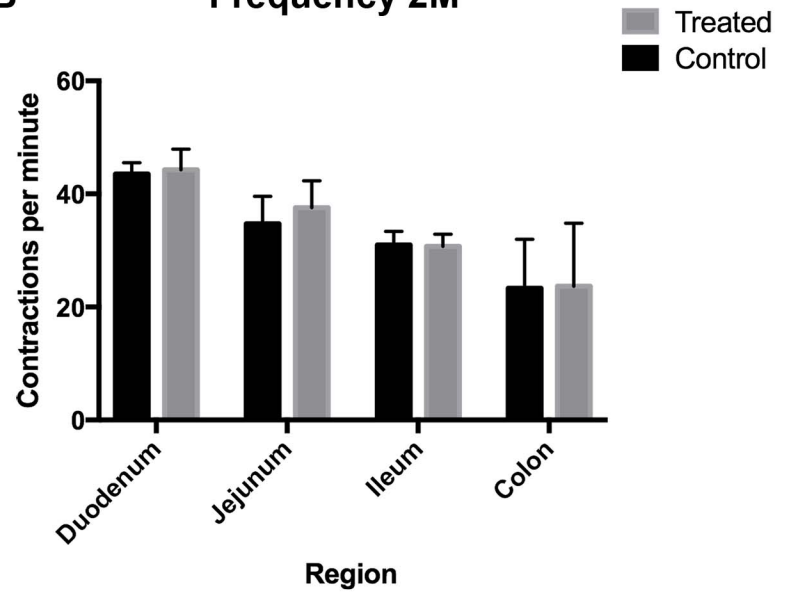

**C** Mean Amplitude 4M

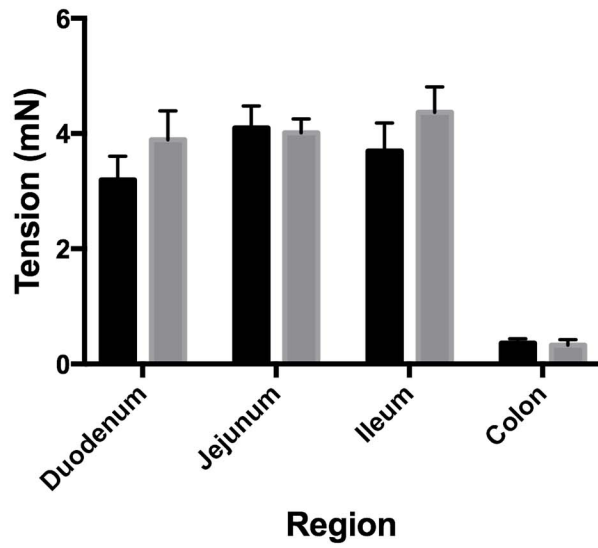

**D** Frequency 4M

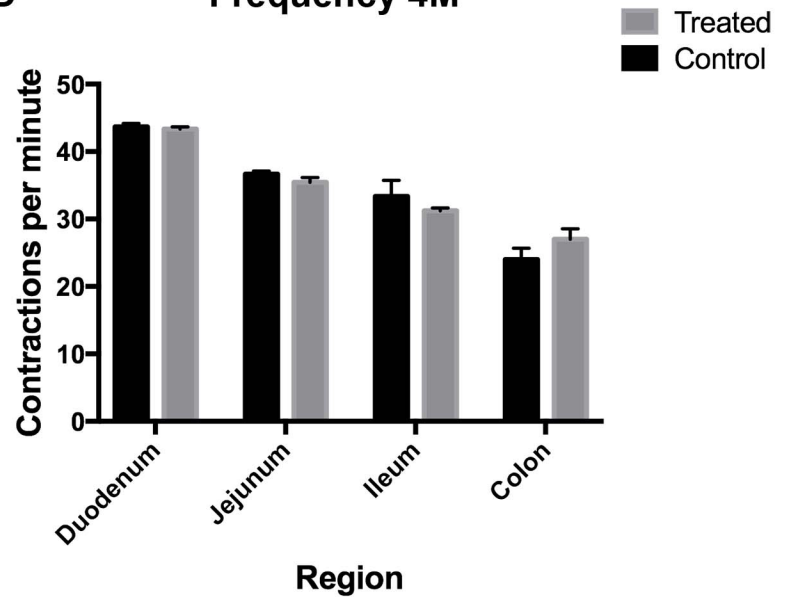

Supp. Fig. 2

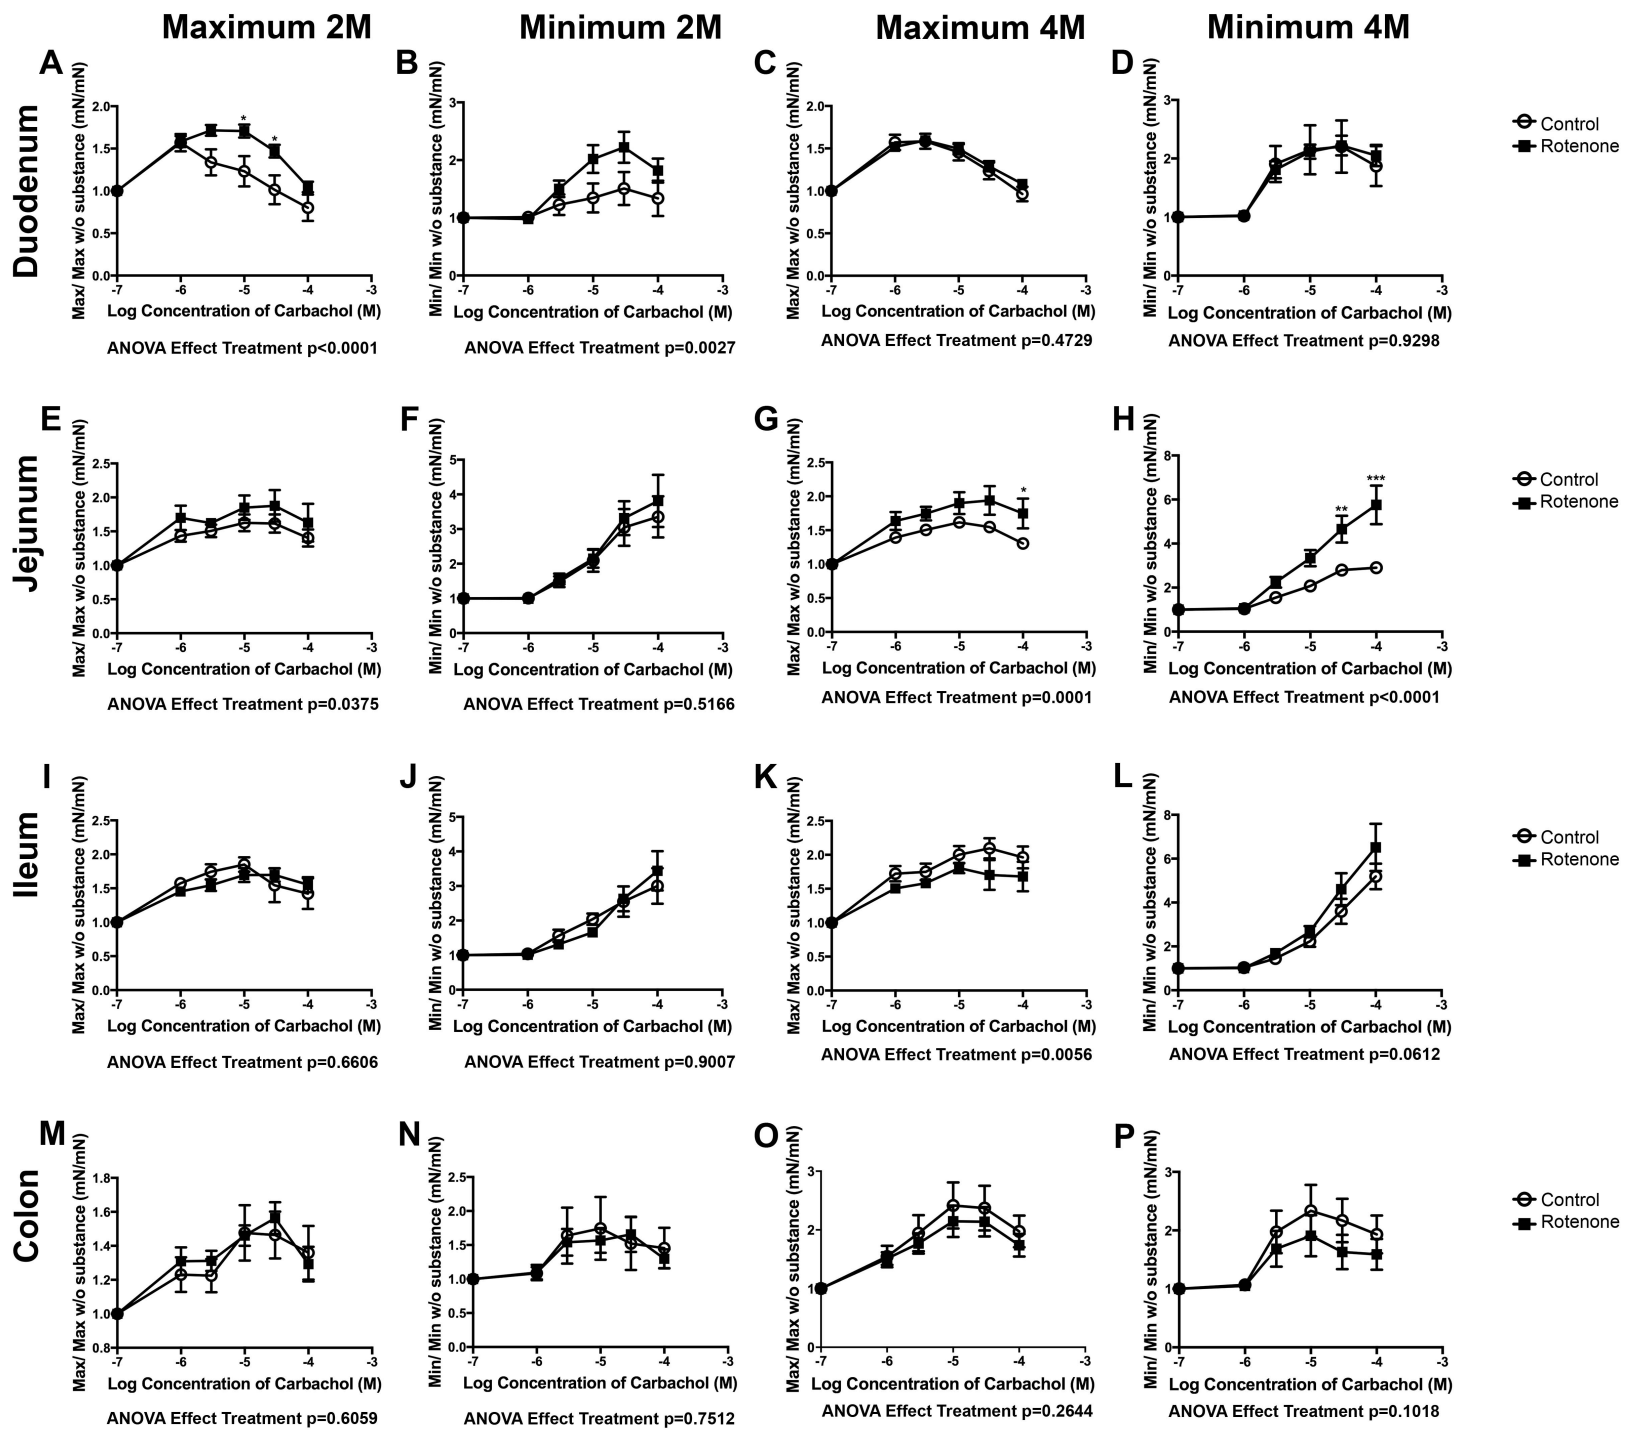

Supp. Fig. 3

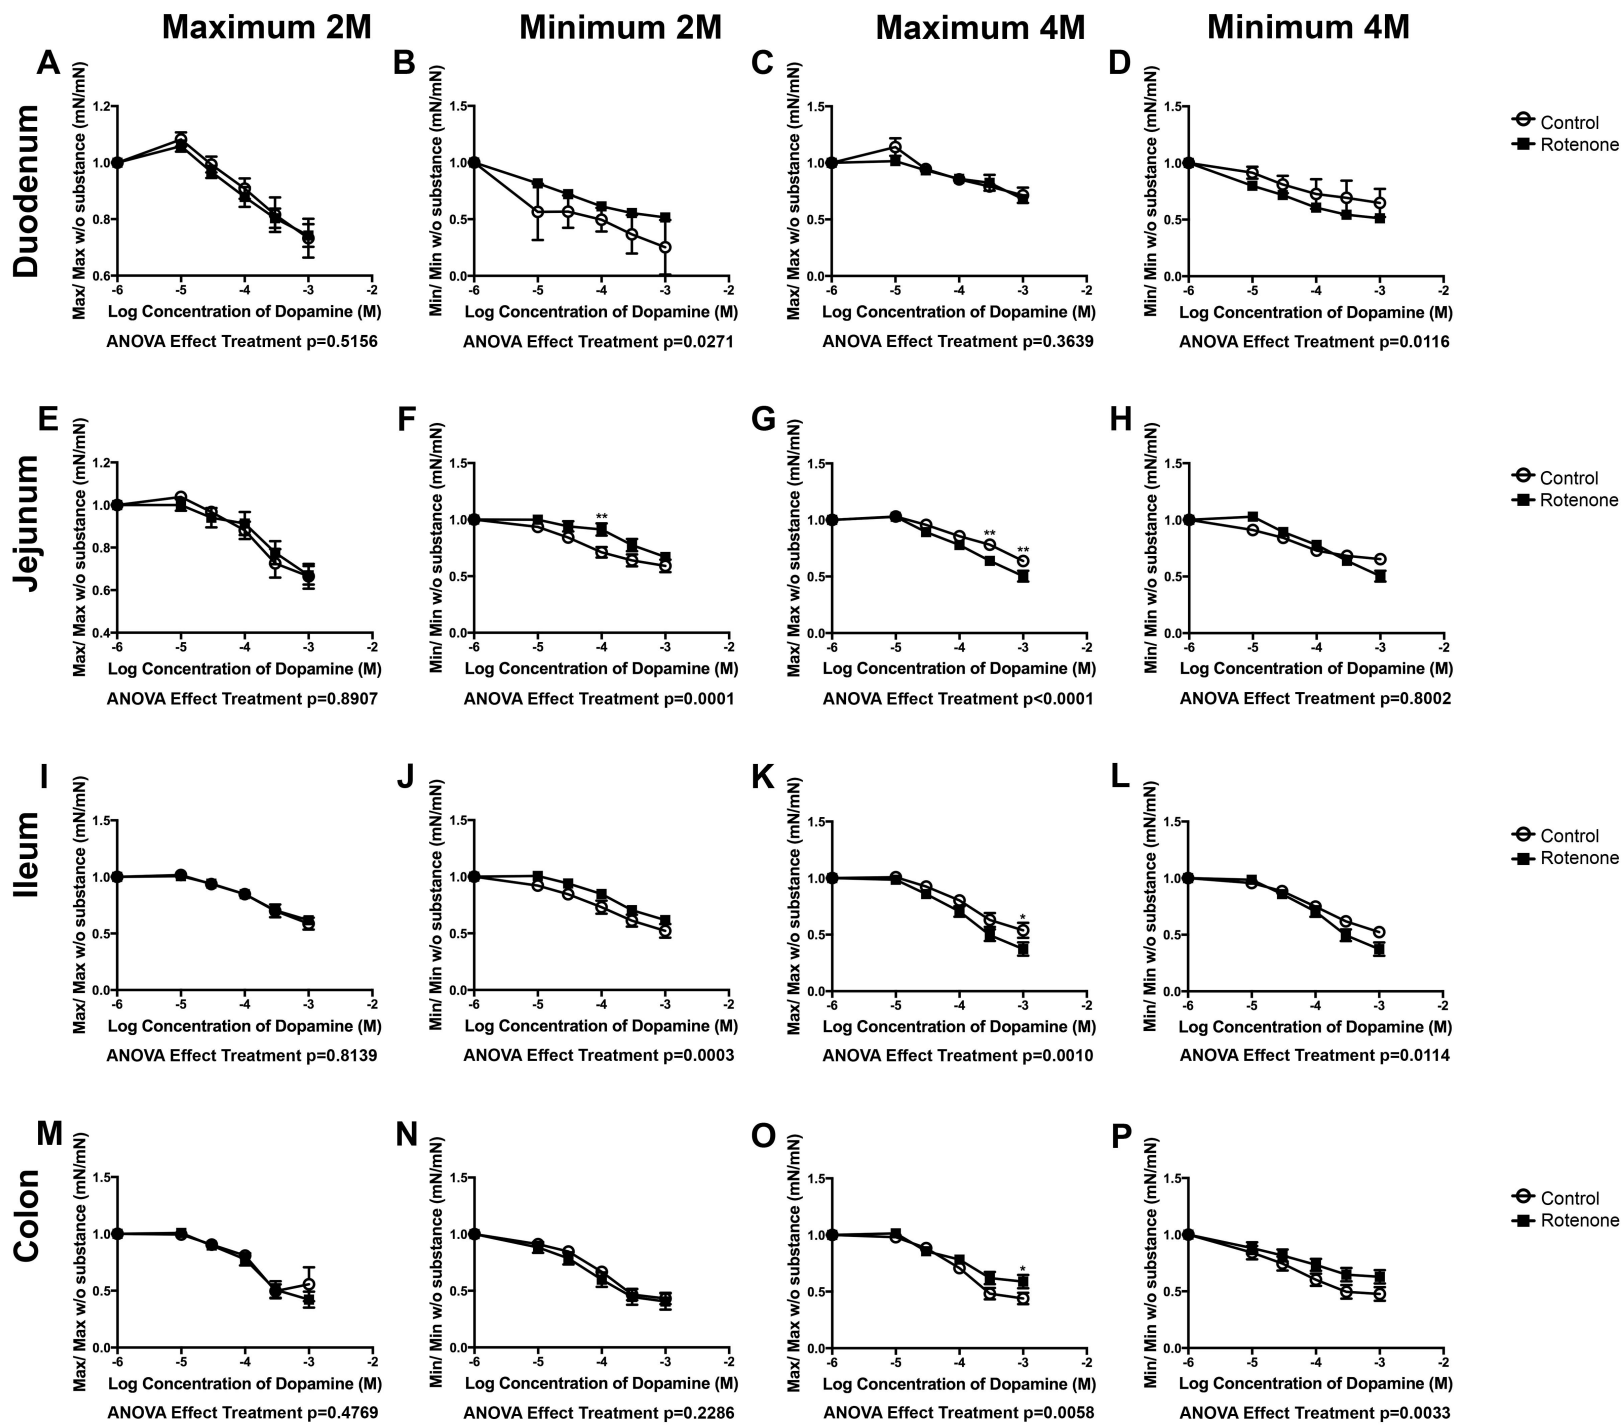

Supp. Fig. 4

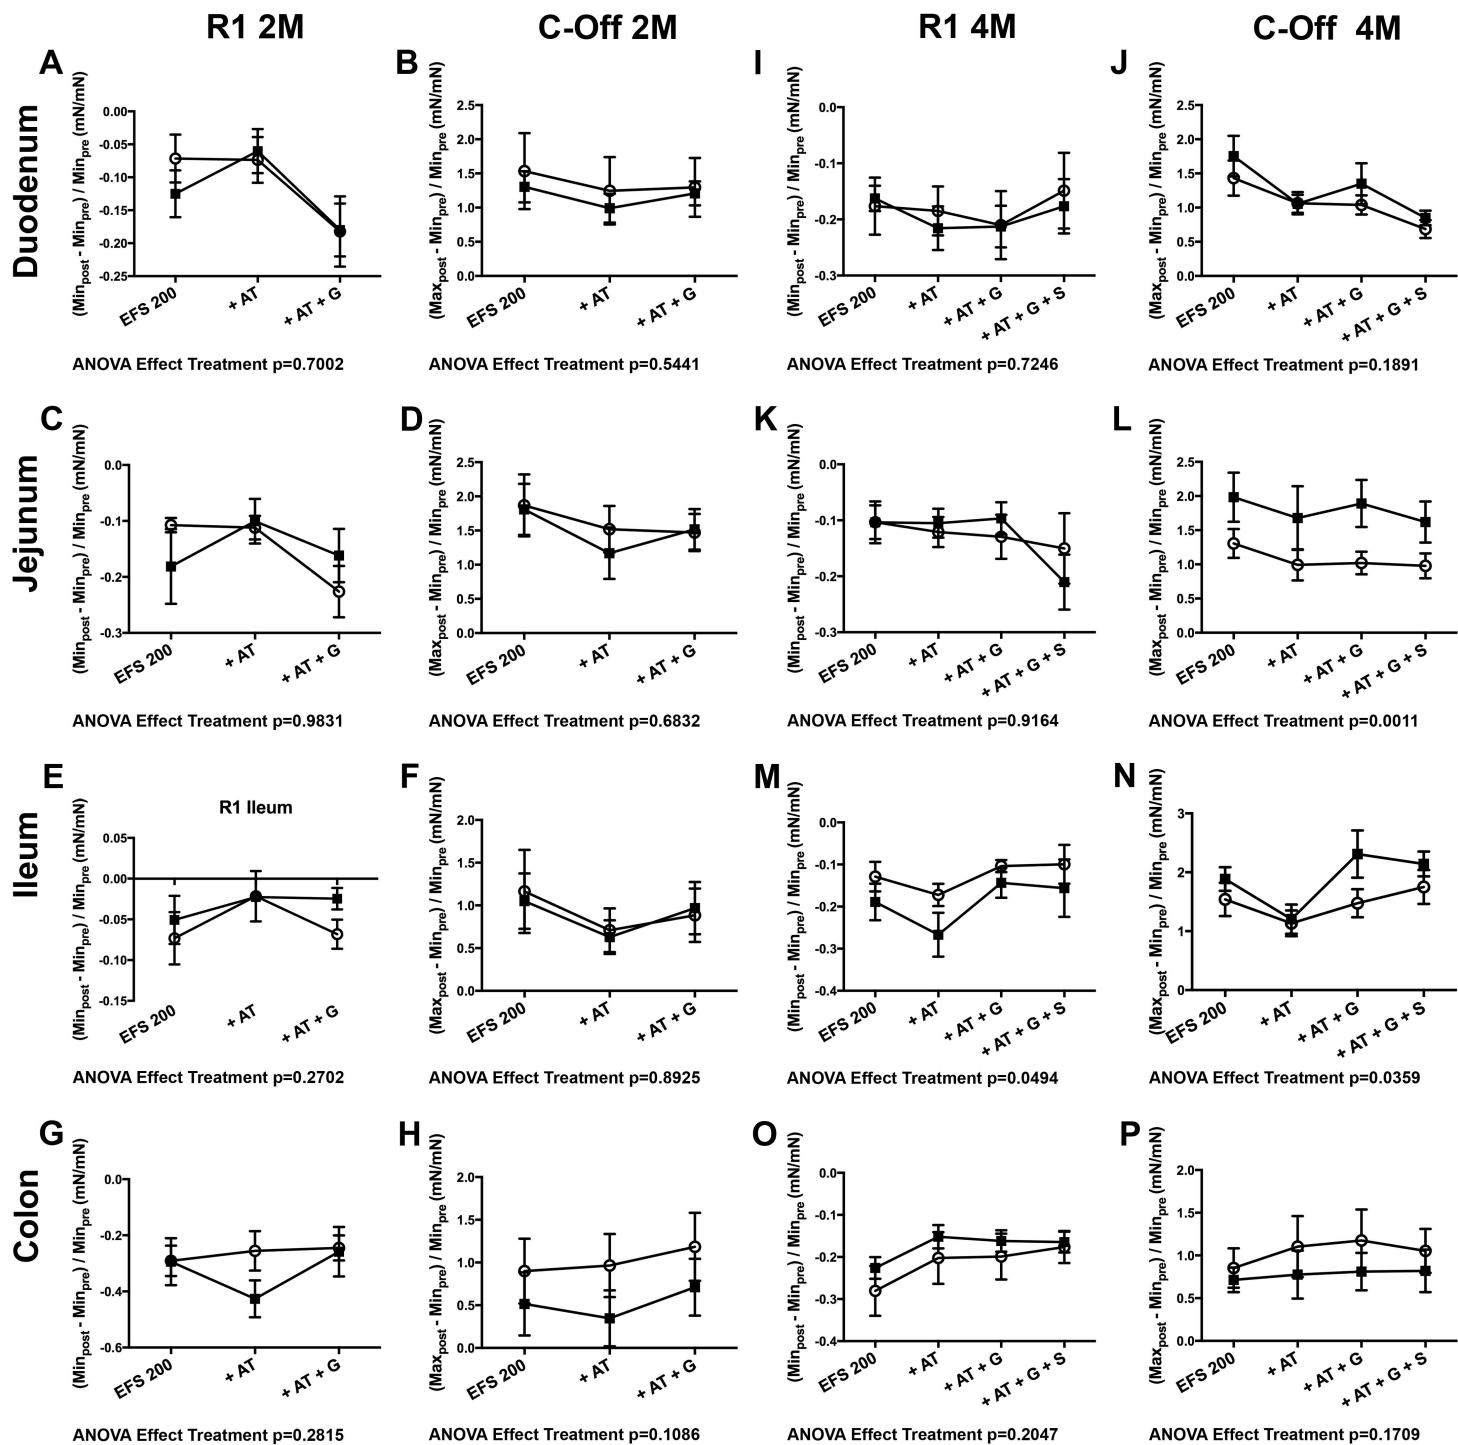

Supp. Fig. 5

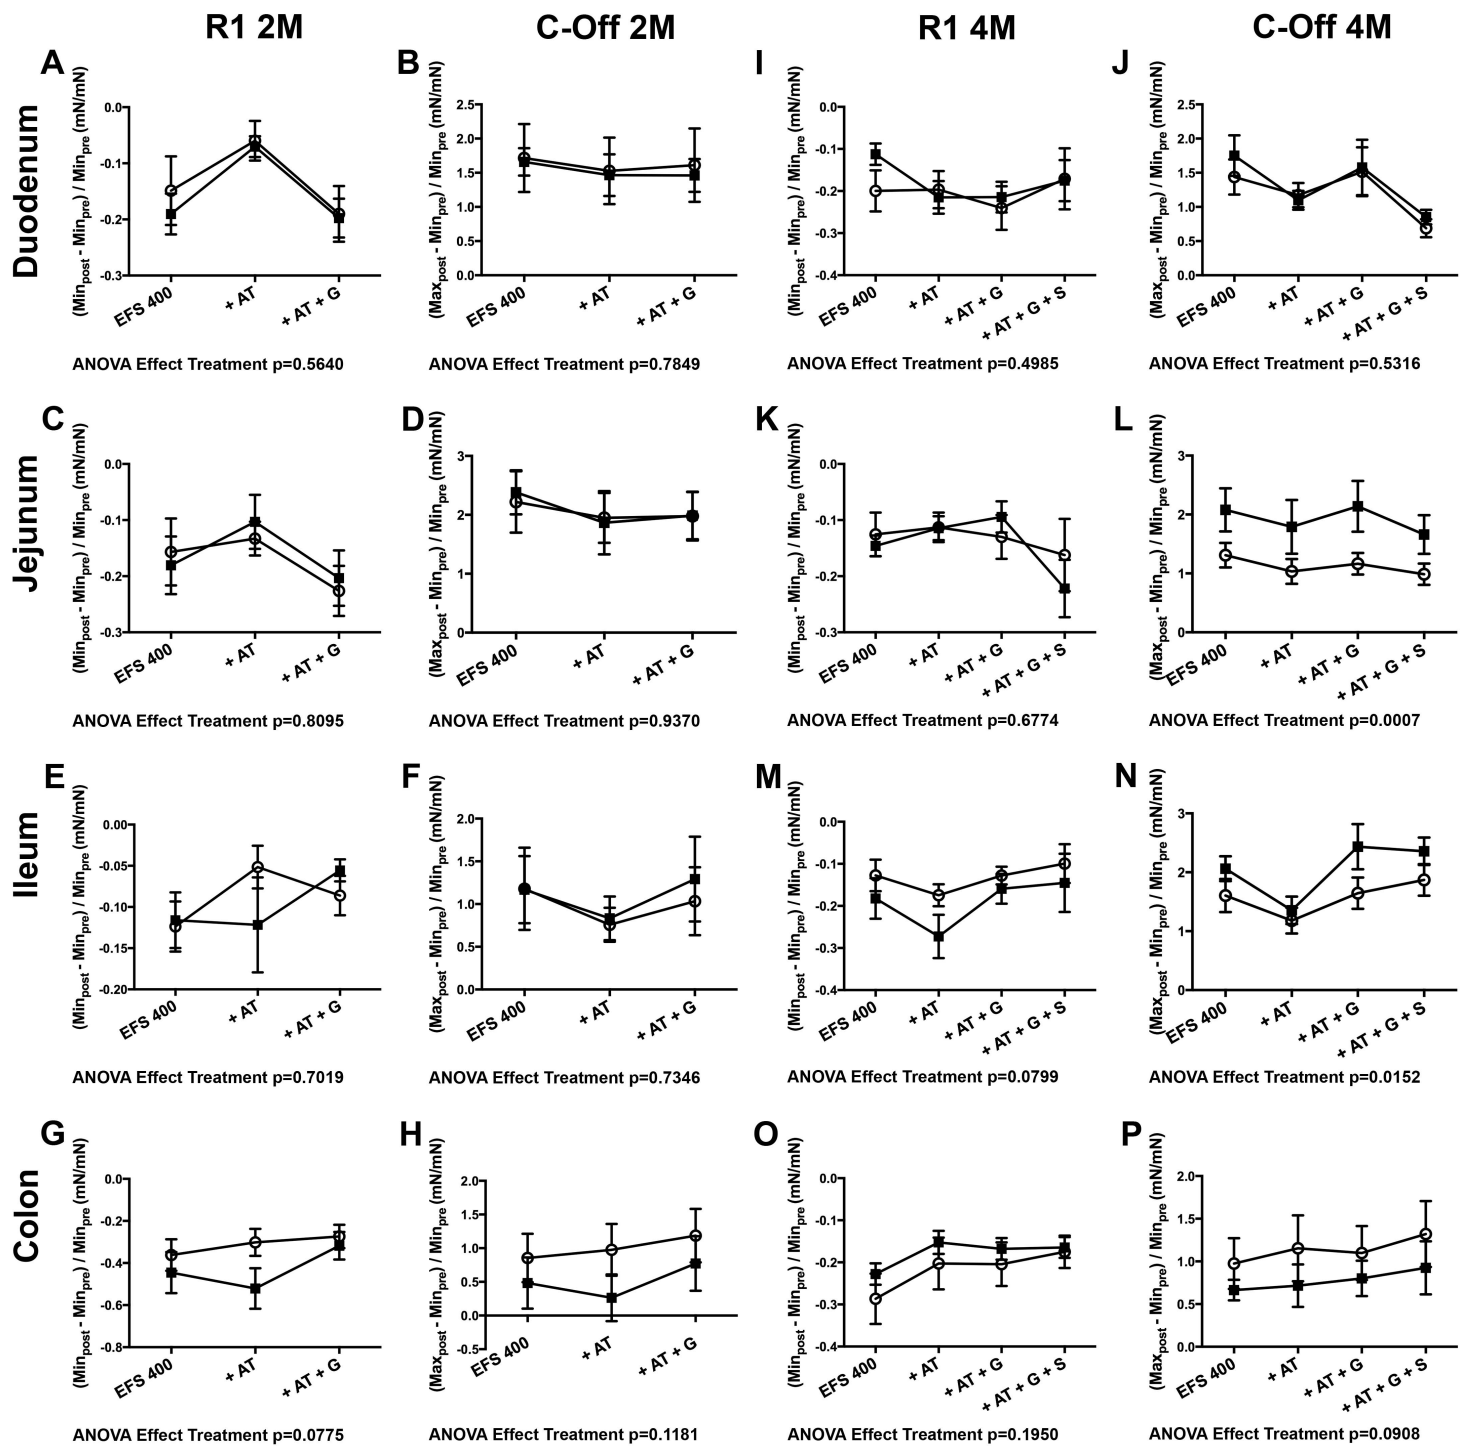

○ Control  
■ Rotenone

**Supplementary figure 1: Mean Amplitude and Frequency of contractions in the regions of the intestine after 2 and 4 months of exposure to rotenone.** Bar graphics in A to D show the comparison of the Mean Amplitude (A and C) and the Frequency of contraction (B and D) after 2 months (A and B) and 4 months (C and D) of rotenone exposure. No significant difference was observed in any of the parameters analyzed. Error bars represent SEM.

**Supplementary figure 2: Comparison between the concentration curves of carbachol and its effects on the different regions of the intestine between control and rotenone exposed mice.** Graphics in A to P show the effect of different concentrations of carbachol on the maximal exerted contractility force (Max) first and third columns and on the intestinal muscle tone (Min) second and fourth columns in two months (2M) and four months (4M) vehicle (empty circle) and rotenone exposed (black square) mice. \*, \*\*\* correspond to  $P<0.05$  and  $P<0.001$  respectively. Error bars represent SEM.

**Supplementary figure 3: Comparison between the concentration curves of dopamine and its effects on the different regions of the intestine between control and rotenone exposed mice.** Graphics in A to P show the effect of different concentrations of dopamine on the maximal exerted contractility force (Max) first and third columns and on the intestinal muscle tone (Min) second and fourth columns in two months (2M) and four months (4M) vehicle (empty circle) and rotenone exposed (black square) mice. \*\* correspond to  $P<0.01$ . Error bars represent SEM.

**Supplementary figure 4: Comparison of the effect of a 200  $\mu$ s electric field stimulation (EFS 200) on the different intestinal regions after 2 and 4 months of rotenone exposure in mice.** Graphics in A to P show variations in the R1 (first and third columns) and C-Off (second and fourth columns) responses to the EFS 200 alone and after the addition of AT alone, AT and G or AT, G and S (serotonin only after 4 months of exposure). The overall response was compared between control and rotenone exposed mice with a 2-way ANOVA. Significance is written under each graphic.

**Supplementary figure 5: Comparison of the effect of a 400  $\mu$ s electric field stimulation (EFS 400) on the different intestinal regions after 2 and 4 months of rotenone exposure in mice.** Graphics in A to P show variations in the in the R1 (first and third columns) and C-Off (second and fourth columns) responses to the EFS 400 alone and after the addition of AT alone, AT and G or AT, G and S (serotonin only after 4 months of exposure). The overall response was compared between control and rotenone exposed mice with a 2-way ANOVA. Significance is written under each graphic.

Table 1

|           |    | 2-way ANOVA Treatment p value |                  |                  |
|-----------|----|-------------------------------|------------------|------------------|
| Carbachol |    | p mean amplitude              | p maximum        | p minimum        |
| Duodenum  | 2M | <b>&lt;0,001</b>              | <b>&lt;0,001</b> | <b>0,003</b>     |
|           | 4M | 0,263                         | 0,473            | 0,930            |
| Jejunum   | 2M | <b>&lt;0,001</b>              | <b>0,038</b>     | 0,517            |
|           | 4M | <b>&lt;0,001</b>              | <b>&lt;0,001</b> | <b>&lt;0,001</b> |
| Ileum     | 2M | 0,009                         | 0,660            | 0,901            |
|           | 4M | 0,288                         | <b>0,006</b>     | 0,061            |
| Colon     | 2M | 0,085                         | 0,606            | 0,751            |
|           | 4M | <b>0,043</b>                  | 0,264            | 0,102            |

Table 2

|          |    | 2-way ANOVA Treatment p value |                  |                  |
|----------|----|-------------------------------|------------------|------------------|
| Dopamine |    | p mean amplitude              | p maximum        | p minimum        |
| Duodenum | 2M | 0,395                         | 0,516            | <b>0,027</b>     |
|          | 4M | <b>0,022</b>                  | 0,364            | <b>0,012</b>     |
| Jejunum  | 2M | 0,689                         | 0,891            | <b>&lt;0,001</b> |
|          | 4M | <b>0,012</b>                  | <b>&lt;0,001</b> | 0,800            |
| Ileum    | 2M | 0,890                         | 0,814            | <b>&lt;0,001</b> |
|          | 4M | <b>0,009</b>                  | <b>0,001</b>     | <b>0,011</b>     |
| Colon    | 2M | 0,186                         | 0,477            | 0,229            |
|          | 4M | 0,286                         | <b>0,006</b>     | <b>0,003</b>     |

Table 3

| R1 AT    |            | Control |         | p            | Rotenone |        | p            | p Control vs Rotenone |
|----------|------------|---------|---------|--------------|----------|--------|--------------|-----------------------|
|          |            | Mean    | SEM     |              | Mean     | SEM    |              |                       |
| Duodenum | 2M EFS 200 | 315,191 | 175,939 | 0,249        | 116,545  | 85,781 | 0,851        | 0,333                 |
|          | 2M EFS 400 | 41,398  | 20,512  | <b>0,017</b> | 44,004   | 18,337 | <b>0,012</b> | 0,926                 |
|          | 4M EFS 200 | 146,393 | 45,084  | 0,290        | 153,464  | 41,517 | 0,216        | 0,148                 |
|          | 4M EFS 400 | 168,833 | 69,876  | 0,311        | 215,126  | 92,574 | 0,232        | 0,342                 |
| Jejunum  | 2M EFS 200 | 118,449 | 33,240  | 0,591        | 72,171   | 42,528 | 0,528        | 0,397                 |
|          | 2M EFS 400 | 155,139 | 67,374  | 0,432        | 66,621   | 31,924 | 0,349        | 0,272                 |
|          | 4M EFS 200 | 201,091 | 49,656  | 0,059        | 81,788   | 18,877 | 0,349        | <b>0,018</b>          |
|          | 4M EFS 400 | 134,984 | 42,752  | 0,425        | 83,759   | 13,506 | 0,247        | 0,499                 |
| Ileum    | 2M EFS 200 | 341,479 | 280,242 | 0,409        | 122,493  | 46,901 | 0,642        | 0,459                 |
|          | 2M EFS 400 | 30,042  | 21,168  | <b>0,008</b> | 136,076  | 36,440 | 0,346        | <b>0,031</b>          |
|          | 4M EFS 200 | 257,809 | 102,348 | 0,121        | 185,114  | 57,208 | 0,156        | 0,116                 |
|          | 4M EFS 400 | 59,825  | 6,443   | <b>0,033</b> | 155,883  | 31,187 | 0,092        | 0,908                 |
| Colon    | 2M EFS 200 | 80,848  | 15,441  | 0,243        | 230,193  | 98,750 | 0,217        | 0,166                 |
|          | 2M EFS 400 | 59,825  | 6,443   | 0,283        | 122,885  | 16,826 | 0,204        | 0,107                 |
|          | 4M EFS 200 | 63,827  | 14,303  | <b>0,022</b> | 70,743   | 10,085 | <b>0,010</b> | 0,698                 |
|          | 4M EFS 400 | 63,568  | 14,458  | <b>0,022</b> | 70,603   | 9,899  | <b>0,009</b> | 0,693                 |



Table 4

| C-Off AT |            | Control |        | p            | Rotenone |        | p                | p Control vs Rotenone |
|----------|------------|---------|--------|--------------|----------|--------|------------------|-----------------------|
|          |            | Mean    | SEM    |              | Mean     | SEM    |                  |                       |
| Duodenum | 2M EFS 200 | 79,173  | 14,143 | 0,171        | 73,393   | 11,249 | <b>0,040</b>     | 0,756                 |
|          | 2M EFS 400 | 95,322  | 20,113 | 0,821        | 90,426   | 18,887 | 0,623            | 0,863                 |
|          | 4M EFS 200 | 81,353  | 9,268  | <b>0,049</b> | 65,884   | 6,538  | <b>&lt;0,001</b> | 0,185                 |
|          | 4M EFS 400 | 88,081  | 8,791  | 0,169        | 68,931   | 6,566  | <b>&lt;0,001</b> | 0,097                 |
| Jejunum  | 2M EFS 200 | 95,973  | 15,359 | 0,799        | 78,510   | 32,023 | 0,517            | 0,634                 |
|          | 2M EFS 400 | 98,213  | 15,010 | 0,908        | 75,032   | 14,189 | 0,109            | 0,288                 |
|          | 4M EFS 200 | 68,503  | 10,650 | <b>0,009</b> | 79,165   | 10,480 | 0,064            | 0,486                 |
|          | 4M EFS 400 | 74,035  | 7,839  | <b>0,004</b> | 82,448   | 10,150 | 0,103            | 0,521                 |
| Ileum    | 2M EFS 200 | 73,371  | 25,338 | 0,318        | 65,949   | 12,992 | <b>0,026</b>     | 0,8                   |
|          | 2M EFS 400 | 80,838  | 20,061 | 0,362        | 76,370   | 10,713 | 0,052            | 0,848                 |
|          | 4M EFS 200 | 81,073  | 21,466 | 0,363        | 59,825   | 6,443  | <b>&lt;0,001</b> | 0,334                 |
|          | 4M EFS 400 | 76,077  | 14,726 | 0,104        | 63,085   | 6,077  | <b>&lt;0,001</b> | 0,408                 |
| Colon    | 2M EFS 200 | 99,826  | 36,553 | 0,996        | 27,022   | 11,878 | <b>&lt;0,001</b> | 0,087                 |
|          | 2M EFS 400 | 94,823  | 47,659 | 0,916        | -16,350  | 27,606 | <b>0,002</b>     | 0,08                  |
|          | 4M EFS 200 | 109,166 | 16,862 | 0,594        | 97,017   | 13,881 | 0,833            | 0,586                 |
|          | 4M EFS 400 | 104,363 | 11,605 | 0,712        | 97,498   | 16,565 | 0,882            | 0,739                 |

Table 5

| R1 AT + G |            | Control AT |         | Control AT + G |         | p     | Rotenone AT |        | Rotenone AT + G |         | p            | p Control vs Rotenone |
|-----------|------------|------------|---------|----------------|---------|-------|-------------|--------|-----------------|---------|--------------|-----------------------|
|           |            | Mean       | SEM     | Mean           | SEM     |       | Mean        | SEM    | Mean            | SEM     |              |                       |
| Duodenum  | 2M EFS 200 | 315,191    | 175,939 | 813,131        | 426,648 | 0,315 | 116,545     | 85,781 | 217,024         | 115,050 | 0,500        | 0,216                 |
|           | 2M EFS 400 | 41,398     | 20,512  | 162,965        | 57,991  | 0,076 | 44,004      | 18,337 | 108,959         | 19,453  | <b>0,035</b> | 0,398                 |
|           | 4M EFS 200 | 146,393    | 45,084  | 129,178        | 24,202  | 0,742 | 153,464     | 41,517 | 181,382         | 55,165  | 0,691        | 0,169                 |
|           | 4M EFS 400 | 168,833    | 69,876  | 267,884        | 148,191 | 0,555 | 215,126     | 92,574 | 218,659         | 89,956  | 0,979        | 0,25                  |
| Jejunum   | 2M EFS 200 | 118,449    | 33,240  | 227,785        | 52,248  | 0,108 | 72,171      | 42,528 | 118,189         | 49,128  | 0,495        | 0,157                 |
|           | 2M EFS 400 | 155,139    | 67,374  | 227,716        | 76,153  | 0,492 | 68,621      | 31,924 | 124,575         | 24,811  | 0,196        | 0,227                 |
|           | 4M EFS 200 | 201,091    | 49,656  | 300,511        | 132,088 | 0,491 | 81,788      | 18,877 | 83,871          | 22,815  | 0,945        | 0,083                 |
|           | 4M EFS 400 | 134,984    | 42,752  | 128,653        | 23,275  | 0,898 | 83,759      | 13,506 | 78,240          | 22,770  | 0,838        | 0,746                 |
| Ileum     | 2M EFS 200 | 341,479    | 280,242 | 565,512        | 454,462 | 0,684 | 122,493     | 46,901 | 82,262          | 44,370  | 0,547        | 0,315                 |
|           | 2M EFS 400 | 30,042     | 21,168  | 76,008         | 27,997  | 0,219 | 136,076     | 36,440 | 68,049          | 36,293  | 0,215        | 0,866                 |
|           | 4M EFS 200 | 257,809    | 102,348 | 202,297        | 101,587 | 0,706 | 185,114     | 57,208 | 128,629         | 59,287  | 0,503        | 0,125                 |
|           | 4M EFS 400 | 172,554    | 33,006  | 136,134        | 33,290  | 0,450 | 155,883     | 31,187 | 104,455         | 29,719  | 0,250        | 0,61                  |
| Colon     | 2M EFS 200 | 80,848     | 15,441  | 83,618         | 6,007   | 0,871 | 230,193     | 98,750 | 70,959          | 24,153  | 0,148        | 0,622                 |
|           | 2M EFS 400 | 82,976     | 15,025  | 76,104         | 3,871   | 0,667 | 122,885     | 16,826 | 72,993          | 5,818   | <b>0,019</b> | 0,666                 |
|           | 4M EFS 200 | 63,827     | 14,303  | 67,565         | 11,668  | 0,842 | 70,743      | 10,085 | 76,206          | 11,101  | 0,720        | 0,594                 |
|           | 4M EFS 400 | 63,568     | 14,458  | 70,230         | 9,817   | 0,708 | 70,603      | 9,899  | 77,240          | 10,367  | 0,650        | 0,63                  |

Table 6

| C-Off AT + G |            | Control AT |        | Control AT + G |         | p     | Rotenone AT |        | Rotenone AT + G |          | p                | p Control vs Rotenone |
|--------------|------------|------------|--------|----------------|---------|-------|-------------|--------|-----------------|----------|------------------|-----------------------|
|              |            | Mean       | SEM    | Mean           | SEM     |       | Mean        | SEM    | Mean            | SEM      |                  |                       |
| Duodenum     | 2M EFS 200 | 79,173     | 14,143 | 90,052         | 7,056   | 0,507 | 73,393      | 11,249 | 103,054         | 14,259   | 0,133            | 0,433                 |
|              | 2M EFS 400 | 95,322     | 20,113 | 95,215         | 14,599  | 0,997 | 90,426      | 18,887 | 88,545          | 11,469   | 0,934            | 0,727                 |
|              | 4M EFS 200 | 81,353     | 9,268  | 79,459         | 9,085   | 0,886 | 65,884      | 6,538  | 74,802          | 6,934    | 0,363            | 0,686                 |
|              | 4M EFS 400 | 88,081     | 8,791  | 102,368        | 8,660   | 0,266 | 68,931      | 6,566  | 86,449          | 8,614    | 0,125            | 0,214                 |
| Jejunum      | 2M EFS 200 | 95,973     | 15,359 | 91,761         | 12,065  | 0,833 | 78,510      | 32,023 | 100,143         | 25,408   | 0,608            | 0,772                 |
|              | 2M EFS 400 | 98,213     | 15,010 | 97,778         | 8,622   | 0,981 | 75,032      | 14,189 | 82,999          | 9,473    | 0,651            | 0,275                 |
|              | 4M EFS 200 | 68,503     | 10,650 | 78,574         | 8,404   | 0,569 | 79,165      | 10,480 | 95,389          | 9,728    | 0,273            | 0,209                 |
|              | 4M EFS 400 | 74,035     | 7,839  | 90,882         | 16,642  | 0,274 | 82,448      | 10,150 | 98,868          | 8,893    | 0,241            | 0,612                 |
| Ileum        | 2M EFS 200 | 73,371     | 25,338 | 84,767         | 13,115  | 0,698 | 65,949      | 12,992 | 97,729          | 14,628   | 0,135            | 0,524                 |
|              | 2M EFS 400 | 80,838     | 20,061 | 91,997         | 12,890  | 0,650 | 76,370      | 10,713 | 105,610         | 12,336   | 0,104            | 0,463                 |
|              | 4M EFS 200 | 81,073     | 21,466 | 106,900        | 20,971  | 0,404 | 59,825      | 6,443  | 121,527         | 17,834   | <b>0,004</b>     | 0,601                 |
|              | 4M EFS 400 | 76,077     | 14,726 | 107,241        | 15,902  | 0,172 | 63,085      | 6,077  | 116,604         | 24,860   | <b>0,004</b>     | 0,673                 |
| Colon        | 2M EFS 200 | 99,826     | 36,553 | 190,669        | 32,531  | 0,093 | 27,022      | 11,878 | 234,174         | 39,160   | <b>&lt;0,001</b> | 0,413                 |
|              | 2M EFS 400 | 94,823     | 47,659 | 564,570        | 365,080 | 0,231 | -16,350     | 27,606 | 1484,669        | 1165,451 | 0,227            | 0,468                 |
|              | 4M EFS 200 | 109,166    | 16,862 | 145,785        | 16,408  | 0,139 | 97,017      | 13,881 | 110,867         | 14,259   | 0,496            | 0,128                 |
|              | 4M EFS 400 | 104,363    | 11,605 | 132,025        | 14,554  | 0,157 | 97,498      | 16,565 | 120,712         | 17,657   | 0,352            | 0,628                 |

Table 7

| Serotonin max | Control |       | Rotenone |       |
|---------------|---------|-------|----------|-------|
|               | Mean    | SEM   | Mean     | SEM   |
| Duodenum      | 1,395   | 0,13  | 1,474    | 0,127 |
| Jejunum       | 1,209   | 0,046 | 1,205    | 0,099 |
| Ileum         | 1,009   | 0,031 | 0,924    | 0,035 |
| Colon         | 0,877   | 0,055 | 0,851    | 0,042 |

  

| p        | Jejunum | Ileum        | Colon            |
|----------|---------|--------------|------------------|
| Duodenum | 0,300   | <b>0,006</b> | <b>&lt;0,001</b> |
| Jejunum  |         | 0,240        | <b>0,013</b>     |
| Ileum    |         |              | 0,594            |

Table 8

| Serotonin min | Control |       | Rotenone |       |
|---------------|---------|-------|----------|-------|
|               | Mean    | SEM   | Mean     | SEM   |
| Duodenum      | 1,202   | 0,086 | 1,249    | 0,080 |
| Jejunum       | 1,118   | 0,066 | 1,068    | 0,029 |
| Ileum         | 0,933   | 0,033 | 0,914    | 0,055 |
| Colon         | 1,030   | 0,085 | 0,972    | 0,026 |

  

| p        | Jejunum | Ileum        | Colon |
|----------|---------|--------------|-------|
| Duodenum | 0,840   | <b>0,069</b> | 0,342 |
| Jejunum  |         | 0,284        | 0,807 |
| Ileum    |         |              | 0,778 |

Table 9

| M3-Receptor |    | Control |       | Rotenone |       | p               |
|-------------|----|---------|-------|----------|-------|-----------------|
|             |    | Mean    | SEM   | Mean     | SEM   |                 |
| Duodenum    | 2M | 1       | 0,068 | 1,187    | 0,091 | <b>&lt;0,01</b> |
|             | 4M | 1       | 0,040 | 1,163    | 0,025 | <b>&lt;0,01</b> |
| Jejunum     | 2M | 1       | 0,033 | 1,224    | 0,046 | <b>&lt;0,01</b> |
|             | 4M | 1       | 0,033 | 1,151    | 0,068 | <b>&lt;0,05</b> |
| Ileum       | 2M | 1       | 0,057 | 1,229    | 0,059 | <b>&lt;0,05</b> |
|             | 4M | 1       | 0,062 | 1,223    | 0,035 | <b>&lt;0,05</b> |
| Colon       | 2M | 1       | 0,042 | 1,166    | 0,456 | <b>&lt;0,05</b> |
|             | 4M | 1       | 0,061 | 1,305    | 0,060 | <b>&lt;0,01</b> |

Table 10

| β2-subunit |    | Control |       | Rotenone |       | p               |
|------------|----|---------|-------|----------|-------|-----------------|
|            |    | Mean    | SEM   | Mean     | SEM   |                 |
| Duodenum   | 2M | 1       | 0,105 | 1,260    | 0,038 | <b>&lt;0,05</b> |
|            | 4M | 1       | 0,012 | 1,425    | 0,104 | <b>&lt;0,01</b> |
| Jejunum    | 2M | 1       | 0,065 | 1,174    | 0,059 | >0,05           |
|            | 4M | 1       | 0,033 | 1,809    | 0,240 | <b>&lt;0,05</b> |
| Ileum      | 2M | 1       | 0,040 | 1,181    | 0,091 | >0,05           |
|            | 4M | 1       | 0,031 | 1,212    | 0,040 | <b>&lt;0,01</b> |
| Colon      | 2M | 1       | 0,012 | 1,287    | 0,067 | <b>&lt;0,01</b> |
|            | 4M | 1       | 0,084 | 1,570    | 0,122 | <b>&lt;0,01</b> |

Table 11

| D2-Receptor |    | Control |       | Rotenone |       | p               |
|-------------|----|---------|-------|----------|-------|-----------------|
|             |    | Mean    | SEM   | Mean     | SEM   |                 |
| Duodenum    | 2M | 1       | 0,044 | 1,065    | 0,066 | >0,05           |
|             | 4M | 1       | 0,190 | 1,653    | 0,189 | <b>&lt;0,05</b> |
| Jejunum     | 2M | 1       | 0,060 | 1,283    | 0,100 | <b>&lt;0,05</b> |
|             | 4M | 1       | 0,150 | 1,179    | 0,080 | >0,05           |
| Ileum       | 2M | 1       | 0,005 | 1,151    | 0,078 | <b>&lt;0,01</b> |
|             | 4M | 1       | 0,047 | 1,153    | 0,060 | >0,05           |
| Colon       | 2M | 1       | 0,064 | 1,514    | 0,016 | <b>&lt;0,05</b> |
|             | 4M | 1       | 0,046 | 1,205    | 0,029 | <b>&lt;0,01</b> |

Table 12

| PGP9.5   |    | Control |      | Rotenone |      | p     |
|----------|----|---------|------|----------|------|-------|
|          |    | Mean    | SEM  | Mean     | SEM  |       |
| Duodenum | 2M | 1       | 0,17 | 0,60     | 0,09 | >0,05 |
|          | 4M | 1       | 0,08 | 0,77     | 0,11 | >0,05 |
| Jejunum  | 2M | 1       | 0,15 | 0,76     | 0,15 | >0,05 |
|          | 4M | 1       | 0,03 | 1,01     | 0,28 | >0,05 |
| Ileum    | 2M | 1       | 0,02 | 1,02     | 0,03 | >0,05 |
| Colon    | 2M | 1       | 0,16 | 1,26     | 0,06 | >0,05 |
|          | 4M | 1       | 0,31 | 1,01     | 0,11 | >0,05 |

Table 13

| ChAT        |    | Control |      | Rotenone |      | p               |
|-------------|----|---------|------|----------|------|-----------------|
|             |    | Mean    | SEM  | Mean     | SEM  |                 |
| Duodenum    | 2M | 1       | 0,11 | 0,84     | 0,16 | >0,05           |
|             | 4M | 1       | 0,17 | 0,58     | 0,09 | >0,05           |
| Jejunum     | 2M | 1       | 0,10 | 0,90     | 0,10 | >0,05           |
|             | 4M | 1       | 0,26 | 0,58     | 0,07 | >0,05           |
| Colon       | 2M | 1       | 0,15 | 0,57     | 0,06 | <b>&lt;0,05</b> |
|             | 4M | 1       | 0,26 | 2,00     | 0,04 | >0,05           |
| All regions | 2M | 1       | 0,06 | 0,77     | 0,06 | <b>&lt;0,05</b> |
|             | 4M | 1       | 0,08 | 0,75     | 0,06 | <b>&lt;0,05</b> |

Table 14

| TH          |    | Control |      | Rotenone |      | p               |
|-------------|----|---------|------|----------|------|-----------------|
|             |    | Mean    | SEM  | Mean     | SEM  |                 |
| Duodenum    | 2M | 1       | 0,07 | 1,71     | 0,15 | <b>&lt;0,01</b> |
|             | 4M | 1       | 0,17 | 0,78     | 0,19 | >0,05           |
| Jejunum     | 2M | 1       | 0,05 | 0,66     | 0,13 | <b>&lt;0,05</b> |
|             | 4M | 1       | 0,23 | 0,98     | 0,24 | >0,05           |
| Ileum       | 2M | 1       | 0,09 | 1,07     | 0,23 | >0,05           |
| Colon       | 2M | 1       | 0,10 | 1,48     | 0,14 | <b>&lt;0,05</b> |
|             | 4M | 1       | 0,24 | 1,29     | 0,16 | >0,05           |
| All regions | 2M | 1       | 0,06 | 0,78     | 0,06 | >0,05           |
|             | 4M | 1       | 0,08 | 0,75     | 0,06 | >0,05           |

**Table 1 Statistical results comparing the reaction to carbachol between vehicle and rotenone-exposed mice.** A 2-way ANOVA was used to compare the effect of carbachol on the amplitude, the maximal exerted contraction force and the muscle tone between vehicle and rotenone-exposed mice. The level of significance is shown as the p value.

**Table 2 Statistical results comparing the reaction to dopamine between vehicle and rotenone-exposed mice.** A 2-way ANOVA was used to compare the effect of dopamine on the amplitude, the maximal exerted contraction force and the muscle tone between vehicle and rotenone-exposed mice. The level of significance is shown as the p value.

**Table 3** shows the mean values (mean), the standard error of the mean (SEM) and the significance (p) of the comparison (unpaired Student's t-test) between the relaxation observed in R1 induced by the EFS (200 and 400 m  $\mu$ s) in the absence of any blocker (consider as 100%) and the relaxation obtained in the presence of atropine (AT) normalized to the value without substance and shown as percentage. The far-right column shows the significance when comparing the results obtained in the presence of AT between control and rotenone exposed mice.

**Table 4** shows the mean values (mean), the standard error of the mean (SEM) and the significance (p) of the comparison (unpaired Student's t-test) between the contraction observed in C-Off induced by the EFS (200 and 400  $\mu$ s) in the absence of any blocker (consider as 100%) and the contraction obtained in the presence of atropine (AT). The far-right column shows the significance when comparing the results obtained in the presence of AT between control and rotenone exposed mice.

**Table 5** shows the mean values (mean), the standard error of the mean (SEM) and the significance (p) of the comparison (unpaired Student's t-test) between the relaxation (R1) obtained with the EFS (200 and 400  $\mu$ s) in the presence of atropine (AT) and in the presence of AT and guanethidine (G). The absence of any blocker is considered as 100% and all other values were normalized to that value. The far-right column shows the significance when comparing the results obtained in the presence of AT and G between control and rotenone exposed mice.

**Table 6** shows the mean values (mean), the standard error of the mean (SEM) and the significance (p) of the comparison (unpaired Student's t-test) between the contraction (C-Off) obtained with the EFS (200 and 400  $\mu$ s) in the presence of atropine (AT) and in the presence of AT and guanethidine (G). The absence of any blocker is considered as 100% and all other values were normalized to that value.

The far-right column shows the significance when comparing the results obtained in the presence of AT and G between control and rotenone exposed mice.

**Table 7** shows the mean values (mean) and the standard error of the mean (SEM) for maximal tension exerted by serotonin (S) when added in the presence of AT and G. The *P*-value table shows the significance of the difference in the effect that S had between regions of the intestine.

**Table 8** shows the mean values (mean) and the standard error of the mean (SEM) for the muscle tone (Min.) by serotonin (S) when added in the presence of AT and G. The *P*-value table shows the significance of the difference in the effect that S had between regions of the intestine.

**Table 9** shows the mean values (mean), the standard error of the mean (SEM) and the significance (p) of the difference between control and rotenone exposed mice in the expression of the muscarinic cholinergic Receptor (M3) normalized to the total amount of neurons (PGP9.5) and to the mean of these values in the control group.

**Table 10** shows the mean values (mean), the standard error of the mean (SEM) and the significance (p) of the difference between control and rotenone exposed mice in the expression of the adrenergic Receptor ( $\beta$ 2-subunit) normalized to the total amount of neurons (PGP9.5) and to the mean of these values in the control group.

**Table 11** shows the mean values (mean), the standard error of the mean (SEM) and the significance (p) of the difference between control and rotenone exposed mice in the expression of the dopaminergic Receptor (D2) normalized to the total amount of neurons (PGP9.5) and to the mean of these values in the control group.

**Table 12** shows the mean values (mean), the standard error of the mean (SEM) and the significance (p) of the difference between control and rotenone exposed mice in the expression of PGP 9.5 normalized to the mean of the control group.

**Table 13** shows the mean values (mean), the standard error of the mean (SEM) and the significance (p) of the difference between control and rotenone exposed mice in the expression of choline acetyltransferase (ChAT) normalized to the total amount of neurons (PGP9.5) and to the mean of these values in the control group.

**Table 14** shows the mean values (mean), the standard error of the mean (SEM) and the significance (p) of the difference between control and rotenone exposed mice in the expression of tyrosine hydroxylase (TH) normalized to the total amount of neurons (PGP9.5) and to the mean of these values in the control group.
